# Supplementary material
Source: publisher figshare collection journal article supplement (https://aacr.figshare.com/articles/dataset/_/22506360)
Supplement: Supplementary file 1 [file 39966702]

### Supplemental Figure 3

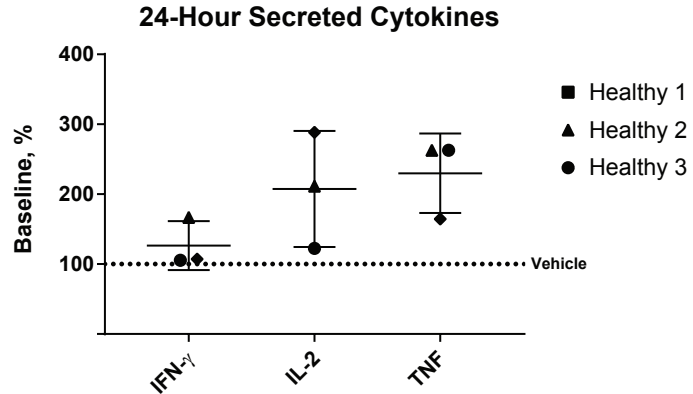

Supplementary Figure 3. Analysis of effector cytokine production following CAR-specific stimulation on 50  $\mu\text{g}$  BCMA beads for 24 hours in the presence of 1  $\mu\text{mol/L}$  lenalidomide compared with baseline (vehicle) response within each donor.
